# Supplementary material for: Trends in the incidence and management of hypoxic-ischaemic encephalopathy in the therapeutic hypothermia era: a national population study
Source: HighWire-hosted journal article supplement (doi:10.1136/archdischild-2020-320902), 2021-03-08
Supplement: archdischild-2020-320902supp001_data_supplement.pdf [file archdischild-2020-320902supp001_data_supplement.pdf]

## Supplementary Online Content

Trends in the Incidence and Management of Hypoxic-Ischaemic Encephalopathy in the Therapeutic Hypothermia Era: A national population study

Shibley LJ<sup>1</sup>, Gale C<sup>2</sup>, Sharkey D<sup>1</sup>

<sup>1</sup> Division of Child Health and Obstetrics and Gynaecology, School of Medicine, University of Nottingham, UK

<sup>2</sup> Neonatal Medicine, School of Public Health, Faculty of Medicine, Imperial College London, Chelsea and Westminster Hospital campus, London, UK

### Corresponding Author:

Dr Don Sharkey, Academic Child Health, E floor, East Block, University Hospital, Derby Rd, Nottingham, NG72UH, UK. Don.Sharkey@nottingham.ac.uk. Tel no. +44 1158230611.

### Content:

|                                                                                                                                                                                                                                                                   |   |
|-------------------------------------------------------------------------------------------------------------------------------------------------------------------------------------------------------------------------------------------------------------------|---|
| <b>Supplementary Figure 1</b> Flowchart of study participants demonstrating included/excluded infants and rate of hypoxic ischaemic encephalopathy for each gestational subgroup                                                                                  | 1 |
| <b>Supplementary Table 1</b> National Neonatal Research Database Hypoxic-Ischaemic Encephalopathy and Therapeutic Hypothermia identifiers                                                                                                                         | 2 |
| <b>Supplementary Table 2</b> Comparison of antenatal and delivery characteristics between epochs (2011-13 and 2014-16) for infants $\geq 36$ weeks gestational age with moderate/severe hypoxic ischaemic encephalopathy who died without therapeutic hypothermia | 3 |
| <b>Supplementary Table 3</b> Comparison of antenatal and delivery characteristics between epoch 1 (2011-13) and 2 (2014-16) for infants $\geq 36$ weeks gestational age with moderate/severe hypoxic ischaemic encephalopathy undergoing therapeutic hypothermia  | 4 |
| <b>Supplementary Table 4</b> Comparison of antenatal and delivery characteristics between epoch 1 (2011-13) and 2 (2014-16) for infants $\geq 36$ weeks gestational age with mild hypoxic ischaemic encephalopathy undergoing therapeutic hypothermia             | 5 |
| <b>Supplementary Table 5</b> Comparison of antenatal and delivery characteristics between infants $\geq 36$ weeks with moderate/severe and mild hypoxic ischaemic encephalopathy undergoing therapeutic hypothermia                                               | 6 |
| <b>Supplementary Table 6</b> Incidence rates for the whole study population by gestational age for any grade of hypoxic ischaemic encephalopathy (HIE),                                                                                                           | 6 |

|                                                                                                                                                                                                                                 |   |
|---------------------------------------------------------------------------------------------------------------------------------------------------------------------------------------------------------------------------------|---|
| moderate/severe HIE and mortality with moderate/severe HIE                                                                                                                                                                      |   |
| <b>Supplementary Table 7</b> Comparison of antenatal and delivery characteristics between epoch 1 (2011-13) and 2 (2014-16) for infants 34 to 35 weeks with hypoxic ischaemic encephalopathy undergoing therapeutic hypothermia | 7 |

**Supplementary Figure 1.** Flowchart of study participants demonstrating included/excluded infants and rate of hypoxic ischaemic encephalopathy for each gestational subgroup

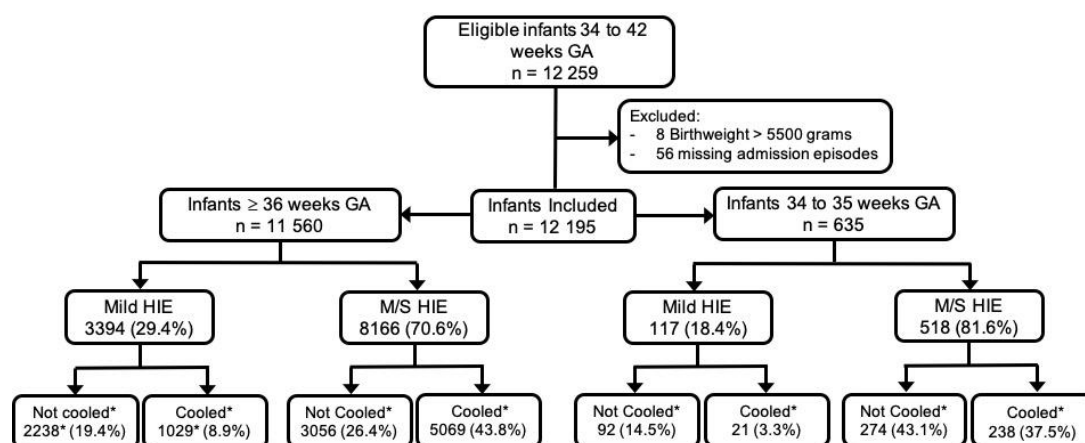

\* Therapeutic hypothermia data not available for all infants within each subgroup  
GA, gestation age; m/s moderate/severe; HIE, Hypoxic Ischaemic encephalopathy

**Supplementary Table 1.** National Neonatal Research Database Hypoxic Ischaemic Encephalopathy and Therapeutic Hypothermia data identifiers

| <b>Principal Diagnosis at Discharge database entry</b>                                                                                                                                                                                                                                                                                                                                                                                                                                                                                                                                                                                                                                                                                                                                                                                                                                                                                                                                                                                                                                                                                                                                                                                                                                                                                                                                                                                                                                                                                                                                                                                           |
|--------------------------------------------------------------------------------------------------------------------------------------------------------------------------------------------------------------------------------------------------------------------------------------------------------------------------------------------------------------------------------------------------------------------------------------------------------------------------------------------------------------------------------------------------------------------------------------------------------------------------------------------------------------------------------------------------------------------------------------------------------------------------------------------------------------------------------------------------------------------------------------------------------------------------------------------------------------------------------------------------------------------------------------------------------------------------------------------------------------------------------------------------------------------------------------------------------------------------------------------------------------------------------------------------------------------------------------------------------------------------------------------------------------------------------------------------------------------------------------------------------------------------------------------------------------------------------------------------------------------------------------------------|
| <p><u>Severe HIE :</u></p> <ul style="list-style-type: none"> <li>- HIE Grade 3 - Severe Neonatal Encephalopathy</li> <li>- Hypoxic ischaemic brain damage ; Severe</li> <li>- Severe perinatal asphyxia (with 1 minute Apgar &lt;4)</li> <li>- Severe Neonatal Encephalopathy - Gr.3</li> <li>- Hypoxic Ischaemic Encephalopathy (Gr 3)</li> <li>- Severe Neonatal Encephalopathy – Grade 3 HIE</li> </ul> <p><u>Moderate HIE:</u></p> <ul style="list-style-type: none"> <li>- HIE Grade 2 - Moderate Neonatal Encephalopathy</li> <li>- Hypoxic ischaemic brain damage ; Moderate</li> <li>- Moderate perinatal asphyxia (with 1 minute Apgar 4-7)</li> <li>- Moderate Neonatal Encephalopathy - Gr.2</li> <li>- Hypoxic Ischaemic Encephalopathy (Gr 2)</li> <li>- Moderate Neonatal Encephalopathy - Grade 2 HIE</li> </ul> <p><u>Mild HIE:</u></p> <ul style="list-style-type: none"> <li>- HIE Grade 1 - Mild Neonatal Encephalopathy</li> <li>- Hypoxic ischaemic brain damage ; Mild</li> <li>- Mild perinatal asphyxia (with 1 minute Apgar &gt;7)</li> <li>- Mild Neonatal Encephalopathy - Gr.1</li> <li>- Hypoxic Ischaemic Encephalopathy (Gr 1)</li> <li>- Mild Neonatal Encephalopathy - Grade 1 HIE</li> <li>- Very mild perinatal asphyxia - clinically normal by 24 hours</li> </ul> <p><u>Unspecified</u></p> <ul style="list-style-type: none"> <li>- Birth Asphyxia</li> <li>- Anoxic Brain Damage</li> </ul> <p><u>Therapeutic Hypothermia</u></p> <ul style="list-style-type: none"> <li>- Therapeutic Hypothermia</li> <li>- Therapeutic Hypothermia (whole body cooling)</li> <li>- Hypothermia Therapeutic</li> </ul> |
| <b>Principal procedures during stay</b>                                                                                                                                                                                                                                                                                                                                                                                                                                                                                                                                                                                                                                                                                                                                                                                                                                                                                                                                                                                                                                                                                                                                                                                                                                                                                                                                                                                                                                                                                                                                                                                                          |
| <p><u>Therapeutic Hypothermia</u></p> <ul style="list-style-type: none"> <li>- Therapeutic Hypothermia</li> <li>- Therapeutic Hypothermia (whole body cooling)</li> <li>- Hypothermia Therapeutic</li> </ul>                                                                                                                                                                                                                                                                                                                                                                                                                                                                                                                                                                                                                                                                                                                                                                                                                                                                                                                                                                                                                                                                                                                                                                                                                                                                                                                                                                                                                                     |

**Supplementary Table 2.** Comparison of antenatal and delivery characteristics between epochs (2011-13 and 2014-16) for infants  $\geq 36$  weeks gestational age with moderate/severe hypoxic ischaemic encephalopathy who died without therapeutic hypothermia

| Variables                                    | Number of infants<br>(n=120)* | Missing<br>n (%) |
|----------------------------------------------|-------------------------------|------------------|
| <b><u>Antenatal Characteristics</u></b>      |                               |                  |
| Diabetes mellitus                            | 0                             | 0                |
| Gestational diabetes                         | 4 (3.3)                       | 0                |
| Preeclampsia                                 | 2 (1.7)                       | 0                |
| Risk factors of early infection <sup>a</sup> | 22 (18.3)                     | 0                |
| <b><u>Delivery Characteristics</u></b>       |                               |                  |
| Gender (male)                                | 61 (50.8)                     | 0                |
| Gestational age (weeks)                      | 39 (37 - 40)                  | 0                |
| Birth weight (grams)                         | 3252 (2840 - 3576)            | 0                |
| > 98 <sup>th</sup> Centile                   | 3 (2.5)                       | 0                |
| Intrapartum events <sup>b</sup>              | 13 (10.8)                     | 0                |
| Apgar 1 minute                               | 2 (0 - 5)                     | 9 (7.5)          |
| Apgar 5 minute                               | 5 (1 - 8)                     | 9 (7.5)          |
| Significant resuscitation <sup>c</sup>       | 58 (38.1)                     | 0                |
| Venous Cord pH                               | 7.23 (7.09 - 7.32)            | 55 (45.8)        |
| Day of death (days)                          | 0.7 (0.37 - 2.0)              | 0                |

\* Data are n (%) or median (interquartile range)

<sup>a</sup> Maternal fever, Chorioamnionitis, prolonged rupture of membranes, urinary tract infection

<sup>b</sup> Cord prolapse, shoulder dystocia, abruption, reduced fetal movements

<sup>c</sup> Chest compressions, intubation, drugs

Data items diabetes mellitus, gestational diabetes, preeclampsia, risk factors for sepsis, intrapartum events and significant resuscitation variables are collected using a tick box, so not possible to accurately determine missing data from absence of a characteristic

**Supplementary Table 3.** Comparison of antenatal and delivery characteristics

between epoch 1 (2011-13) and 2 (2014-16) for infants  $\geq 36$  weeks gestational age with moderate/severe hypoxic ischaemic encephalopathy undergoing therapeutic hypothermia

| Variables                                    | Infants $\geq 36$ weeks GA with moderate/severe HIE and TH |                  |                       |                  | p value** |
|----------------------------------------------|------------------------------------------------------------|------------------|-----------------------|------------------|-----------|
|                                              | Epoch 1<br>(n=2286)*                                       | Missing<br>n (%) | Epoch 2<br>(n=2783)*  | Missing<br>n (%) |           |
| Diabetes mellitus                            | 13 (0.6)                                                   | 0                | 46 (1.7)              | 0                | <0.001    |
| Gestational diabetes                         | 63 (2.8)                                                   | 0                | 123 (4.4)             | 0                | 0.002     |
| Preeclampsia                                 | 111 (4.9)                                                  | 0                | 122 (4.3)             | 0                | 0.43      |
| Risk factors of early infection <sup>a</sup> | 384 (16.8)                                                 | 0                | 732 (26.3)            | 0                | <0.001    |
| <b>Delivery Characteristics</b>              |                                                            |                  |                       |                  |           |
| Gender (male)                                | 1244 (54.4)                                                | 0                | 1528 (54.9)           | 0                | 0.70      |
| Gestational age (weeks)                      | 40 (38 – 41)                                               | 0                | 40 (38 – 41)          | 0                | 0.04      |
| Birth weight (grams)                         | 3355<br>(2958 – 3760)                                      | 0                | 3330<br>(2940 – 3750) | 0                | 0.29      |
| > 98 <sup>th</sup> Centile                   | 131 (5.7)                                                  | 0                | 158 (5.6)             | 0                | 0.94      |
| Intrapartum events <sup>b</sup>              | 278 (12.2)                                                 | 0                | 351 (12.6)            | 0                | 0.63      |
| Apgar 1 minute                               | 1 (0 – 3)                                                  | 156 (6.8)        | 1 (1 – 3)             | 209 (7.5)        | 0.37      |
| Apgar 5 minute                               | 4 (2 – 6)                                                  | 159 (7.0)        | 4 (2 – 6)             | 198 (7.1)        | 0.03      |
| Significant resuscitation <sup>c</sup>       | 1136 (51.9)                                                | 0                | 1934 (71.3)           | 0                | <0.001    |
| Venous Cord pH                               | 7.11<br>(6.93 – 7.25)                                      | 698 (30.5)       | 7.13<br>(6.97 – 7.26) | 803 (28.8)       | 0.009     |

GA, Gestational age; HIE, Hypoxic-ischaemic encephalopathy; TH, Therapeutic hypothermia

\* Data are n (%) or median (interquartile range)

\*\* Categorical data analysed using Chi Squared test; Non-normally distributed continuous data analysed using Mann U Whitney test

<sup>a</sup> Maternal fever, Chorioamnionitis, prolonged rupture of membranes, urinary tract infection

<sup>b</sup> Cord prolapse, shoulder dystocia, abruption, reduced fetal movements

<sup>c</sup> Chest compressions, intubation, drugs

Data items diabetes mellitus, gestational diabetes, preeclampsia, risk factors for sepsis, intrapartum events and significant resuscitation variables are collected using a tick box, so not possible to accurately determine missing data from absence of a characteristic

**Supplementary Table 4.** Comparison of antenatal and delivery characteristics between epoch 1 (2011-13) and 2 (2014-16) for infants  $\geq 36$  weeks gestational age with mild hypoxic ischaemic encephalopathy undergoing therapeutic hypothermia

| Variables                                    | Infants $\geq 36$ weeks GA with mild HIE and TH |                  |                       |                  | p value** |
|----------------------------------------------|-------------------------------------------------|------------------|-----------------------|------------------|-----------|
|                                              | Epoch 1<br>(n=426)*                             | Missing<br>n (%) | Epoch 2<br>(n=603)*   | Missing<br>n (%) |           |
| <b>Antenatal Characteristics</b>             |                                                 |                  |                       |                  |           |
| Diabetes mellitus                            | 1 (0.2)                                         | 0                | 6 (1.0)               | 0                | 0.14      |
| Gestational diabetes                         | 8 (1.9)                                         | 0                | 18 (3.0)              | 0                | 0.27      |
| Preeclampsia                                 | 10 (2.3)                                        | 0                | 23 (3.8)              | 0                | 0.19      |
| Risk factors of early infection <sup>a</sup> | 69 (16.2)                                       | 0                | 142 (23.5)            | 0                | 0.004     |
| <b>Delivery Characteristics</b>              |                                                 |                  |                       |                  |           |
| Gender (male)                                | 243 (57.0)                                      | 0                | 347 (57.5)            | 0                | 0.85      |
| Gestational age (weeks)                      | 40 (39 – 41)                                    | 0                | 40 (39 – 41)          | 0                | 0.60      |
| Birth weight (grams)                         | 3405<br>(2970 – 3760)                           | 0                | 3330<br>(2950 – 3705) | 0                | 0.10      |
| > 98 <sup>th</sup> Centile                   | 16 (3.8)                                        | 0                | 17 (2.8)              | 0                | 0.40      |
| Intrapartum events <sup>b</sup>              | 37 (8.7)                                        | 0                | 52 (8.6)              | 0                | 0.97      |
| Apgar 1 minute                               | 2 (1 – 4)                                       | 38 (8.9)         | 3 (1 – 5)             | 58 (9.6)         | 0.02      |
| Apgar 5 minute                               | 5 (4 – 7)                                       | 40 (9.4)         | 6 (4 – 7)             | 50 (8.3)         | 0.04      |
| Significant resuscitation <sup>c</sup>       | 163 (38.3)                                      | 0                | 270 (44.8)            | 0                | 0.04      |
| Venous Cord pH                               | 7.14                                            | 120 (28.2)       | 7.14                  | 161 (26.7)       | 0.78      |

---

(6.98 – 7.25)

(6.99 – 7.25)

---

GA, Gestational age; HIE, Hypoxic-ischaemic encephalopathy; TH, Therapeutic hypothermia

\* Data are n(%) or median (interquartile range)

\*\* Categorical data analysed using Chi Squared test; Non-normally distributed continuous data analysed using Mann U Whitney test

<sup>a</sup> Maternal fever, Chorioamnionitis, prolonged rupture of membranes, urinary tract infection

<sup>b</sup> Cord prolapse, shoulder dystocia, abruption, reduced fetal movements

<sup>c</sup> Chest compressions, intubation, drugs

Data items diabetes mellitus, gestational diabetes, preeclampsia, risk factors for sepsis, intrapartum events and significant resuscitation variables are collected using a tick box, so not possible to accurately determine missing data from absence of a characteristic



**Supplementary Table 5.** Comparison of antenatal and delivery characteristics between infants  $\geq 36$  weeks with moderate/severe and mild hypoxic ischaemic encephalopathy undergoing therapeutic hypothermia

| Variables                                    | Infants $\geq 36$ weeks GA with M/S versus mild HIE and TH |               |                       |               | p value** |
|----------------------------------------------|------------------------------------------------------------|---------------|-----------------------|---------------|-----------|
|                                              | M/S HIE (n=5069)*                                          | Missing n (%) | Mild HIE (n=1029)*    | Missing n (%) |           |
| <b>Antenatal Characteristics</b>             |                                                            |               |                       |               |           |
| Diabetes mellitus                            | 59 (1.2)                                                   | 0             | 7 (0.7)               | 0             | 0.17      |
| Gestational diabetes                         | 186 (3.7)                                                  | 0             | 26 (2.5)              | 0             | 0.07      |
| Preeclampsia                                 | 233 (4.6)                                                  | 0             | 33 (3.2)              | 0             | 0.05      |
| Risk factors of early infection <sup>a</sup> | 1116 (22.0)                                                | 0             | 211 (20.5)            | 0             | 0.28      |
| <b>Delivery Characteristics</b>              |                                                            |               |                       |               |           |
| Gender (male)                                | 2772 (54.7)                                                | 0             | 590 (57.3)            | 0             | 0.12      |
| Gestational age (weeks)                      | 40 (38 – 41)                                               | 0             | 40 (39 – 41)          | 0             | <0.001    |
| Birth weight (grams)                         | 3340<br>(2950 – 3760)                                      | 0             | 3360<br>(2965 – 3740) | 0             | 0.98      |
| > 98 <sup>th</sup> Centile                   | 289 (5.7)                                                  | 0             | 33 (3.2)              | 0             | 0.001     |
| Intrapartum events <sup>b</sup>              | 629 (12.4)                                                 | 0             | 89 (8.6)              | 0             | 0.001     |
| Apgar 1 minute                               | 1 (0 - 3)                                                  | 365 (7.2)     | 3 (1 – 5)             | 96 (9.3)      | <0.001    |
| Apgar 5 minute                               | 4 (2 – 6)                                                  | 357 (7.0)     | 5 (4 – 7)             | 90 (8.7)      | <0.001    |
| Significant resuscitation <sup>c</sup>       | 3070 (60.6)                                                | 0             | 433 (42.1)            | 0             | <0.001    |
| Venous Cord pH                               | 7.13<br>(6.96 – 7.25)                                      | 1501 (29.6)   | 7.14<br>(6.99 – 7.25) | 281 (27.3)    | 0.06      |

GA, Gestational age; m/s, moderate/severe; HIE, Hypoxic-ischaemic encephalopathy; TH, Therapeutic hypothermia

\* Data are n (%) or median (interquartile range)

\*\* Categorical data analysed using Chi Squared test; Non-normally distributed continuous data analysed using Mann U Whitney test

<sup>a</sup> Maternal fever, Chorioamnionitis, prolonged rupture of membranes, urinary tract infection

<sup>b</sup> Cord prolapse, shoulder dystocia, abruption, reduced fetal movements

<sup>c</sup> Chest compressions, intubation, drugs

Data items diabetes mellitus, gestational diabetes, preeclampsia, risk factors for sepsis, intrapartum events and significant resuscitation variables are collected using a tick box, so not possible to accurately determine missing data from absence of a characteristic

**Supplementary Table 6.** Incidence rates for the whole study population by gestational age for any grade of hypoxic ischaemic encephalopathy (HIE), moderate/severe HIE and mortality with moderate/severe HIE

| <b>Gestation (weeks)</b> | <b>Any grade HIE (n=12195)</b> | <b>Rate per 1000 live births</b> | <b>M/S HIE &amp; TH (n=5307)</b> | <b>Rate per 1000 live births</b> | <b>Died &amp; M/S HIE (n=843)</b> | <b>Rate per 1000 live births</b> |
|--------------------------|--------------------------------|----------------------------------|----------------------------------|----------------------------------|-----------------------------------|----------------------------------|
| <b>34</b>                | 255                            | 6.22                             | 76                               | 1.85                             | 41                                | 1.00                             |
| <b>35</b>                | 380                            | 6.31                             | 162                              | 2.69                             | 40                                | 0.66                             |
| <b>36</b>                | 615                            | 5.04                             | 319                              | 2.61                             | 66                                | 0.54                             |
| <b>37</b>                | 977                            | 3.50                             | 483                              | 1.73                             | 81                                | 0.29                             |
| <b>38</b>                | 1344                           | 2.38                             | 612                              | 1.09                             | 109                               | 0.19                             |
| <b>39</b>                | 1989                           | 1.97                             | 858                              | 0.85                             | 129                               | 0.13                             |
| <b>40</b>                | 3319                           | 2.94                             | 1456                             | 1.29                             | 212                               | 0.19                             |
| <b>41</b>                | 2837                           | 3.63                             | 1163                             | 1.51                             | 144                               | 0.18                             |
| <b>42</b>                | 479                            | 3.49                             | 178                              | 1.34                             | 21                                | 0.15                             |
| <b>Total</b>             |                                |                                  |                                  |                                  |                                   |                                  |
| <b>34-35 weeks</b>       | 635                            | 6.27                             | 238                              | 2.35                             | 81                                | 0.80                             |
| <b>≥36 weeks</b>         | 11560                          | 3.03                             | 5069                             | 1.26                             | 762                               | 0.19                             |

M/S, moderate/severe; TH, Therapeutic Hypothermia

**Supplementary Table 7.** Comparison of antenatal and delivery characteristics

between epoch 1 (2011-13) and 2 (2014-16) for infants 34 to 35 weeks with hypoxic ischaemic encephalopathy undergoing therapeutic hypothermia

| Variables                                    | Infants 34 to 35 weeks GA with HIE and TH |                  |                       |                  | p value** |
|----------------------------------------------|-------------------------------------------|------------------|-----------------------|------------------|-----------|
|                                              | Epoch 1<br>(n=103)*                       | Missing<br>n (%) | Epoch 2<br>(n=156)*   | Missing<br>n (%) |           |
| <b>Antenatal Characteristics</b>             |                                           |                  |                       |                  |           |
| Diabetes mellitus                            | 1 (1.0)                                   | 0                | 10 (6.4)              | 0                | 0.03      |
| Gestational diabetes                         | 6 (5.8)                                   | 0                | 14 (9.0)              | 0                | 0.35      |
| Preeclampsia                                 | 8 (7.8)                                   | 0                | 17 (10.9)             | 0                | 0.40      |
| Risk factors of early infection <sup>a</sup> | 24 (23.3)                                 | 0                | 40 (25.6)             | 0                | 0.67      |
| <b>Delivery Characteristics</b>              |                                           |                  |                       |                  |           |
| Gender (male)                                | 60 (58.3)                                 | 0                | 92 (59.0)             | 0                | 0.91      |
| Gestational age (weeks)                      | 35 (34 – 35)                              | 0                | 35 (34 – 35)          | 0                | 0.38      |
| Birth weight (grams)                         | 2275<br>(2030 - 2650)                     | 0                | 2370<br>(2122 – 2640) | 0                | 0.14      |
| > 98 <sup>th</sup> Centile                   | 6 (5.8)                                   | 0                | 12 (7.7)              | 0                | 0.56      |
| Intrapartum events <sup>b</sup>              | 21 (20.4)                                 | 0                | 37 (23.7)             | 0                | 0.53      |
| Apgar 1 minute                               | 1 (0 – 3)                                 | 7 (6.8)          | 1 (0 – 3)             | 8 (5.1)          | 0.79      |
| Apgar 5 minute                               | 4 (1 – 5)                                 | 8 (7.8)          | 3 (1 – 6)             | 8 (5.1)          | 0.64      |
| Significant resuscitation <sup>c</sup>       | 56 (54.4)                                 | 0                | 119 (76.3)            | 0                | <0.001    |
| Venous Cord pH                               | 7.03<br>(6.85 – 7.23)                     | 40 (38.8)        | 7.08<br>(6.85 – 7.26) | 60 (38.5)        | 0.56      |

GA, Gestational age; HIE, Hypoxic-ischaemic encephalopathy; TH, Therapeutic hypothermia

\* Data are n(%) or median (interquartile range)

\*\* Categorical data analysed using Chi Squared test; Non-normally distributed continuous data analysed using Mann U Whitney test

<sup>a</sup> Maternal fever, Chorioamnionitis, prolonged rupture of membranes, urinary tract infection

<sup>b</sup> Cord prolapse, shoulder dystocia, abruption, reduced fetal movements

<sup>c</sup> Chest compressions, intubation, drugs

Data items diabetes mellitus, gestational diabetes, preeclampsia, risk factors for sepsis, intrapartum events and significant resuscitation variables are collected using a tick box, so not possible to accurately determine missing data from absence of a characteristic
